# Supplementary material
Source: PubMed Central journal article supplement (PMC3173791)
Supplement: emboj2011263s1.pdf [file emboj2011263s1.pdf]

FBF represses the Cip/Kip cell cycle inhibitor CKI-2 to  
promote self-renewal of germline stem cells in *C. elegans*

Irene Kalchhauser, Brian M. Farley, Sandra Pauli, Sean P. Ryder, and Rafal Ciosk

## Supplemental Data

### **Inventory:**

Supplemental Figures and Legends

Supplemental Methods

Supplemental References cited in Supplemental Methods

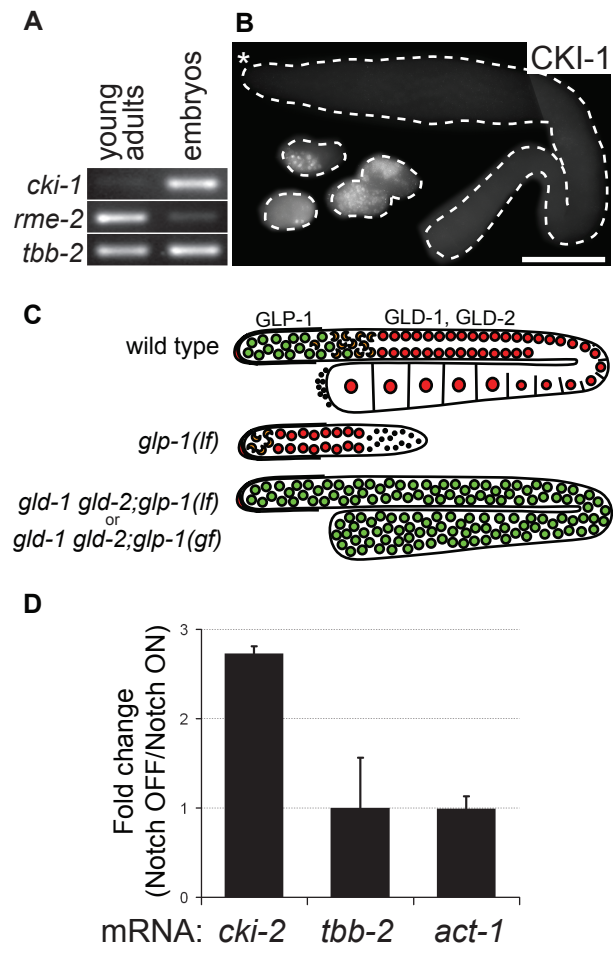

## Figure S1

*CKI-2, but not CKI-1, is predominantly expressed in the adult germ line.*

(A) Semi-quantitative RT-PCR of indicated mRNAs. (B) Immuno-staining for CKI-1 protein on dissected gonads and embryos. Scale bar: 50 $\mu$ m. Both *cki-1* mRNA and CKI-1 protein can be detected in embryos, but are absent from non-gravid young adults. (C) A simplified view of GLP-1/Notch function in maintaining germline stem cells. In *glp-1(lf)* mutants, all germ cells enter meiosis, which depends on the pro-meiotic factors GLD-1 and GLD-2. In *gld-1 gld-2* mutants, germ cells proliferate independently of Notch signaling in either the presence of an additional loss-of-function mutation *glp-1(lf)* or a gain-of-function mutation *glp-1(gf)*. green, proliferating germline stem cells; yellow, nuclei entering meiosis; red, nuclei undergoing meiotic differentiation. (D) GLP-1/Notch signaling negatively regulates *cki-2* mRNA levels. The abundance of indicated mRNAs in gonads dissected from either *gld-1 gld-2; glp-1(lf)* (Notch OFF) or *gld-1 gld-2; glp-1(gf)* (Notch ON) gonads was measured by RT-qPCR. Control mRNAs: *tbb-2* (tubulin) and *act-1* (actin). Error bars = SEM, n = 3 (see Material and Methods).





## Figure S2

*Dissecting potential regulatory elements in the cki-2 3'UTR.*

Alignment of *cki-2* 3'UTR sequences from *C.elegans*, *C.remanei*, *C.brenneri*, and *C.briggsae*, with the positions of both halvesites of MRE1 and MRE2 and the UGU trinucleotides of FBE1-4 indicated in colors.

The region required for repression,  $\Delta$ FBE1-4, is boxed. Bold: TAA, the stop codon of the *cki-2* S ORF.

Nucleotides conserved between all four species are marked with an asterisk.

Kalchauer et al, Supplementary Fig.3

**A**

| Oligo name             | Kd, app (GS) | Kd, app (FP) |
|------------------------|--------------|--------------|
| <i>cki-2</i> MRE2      | 9 ± 1 nM     | 15 ± 2 nM    |
| <i>cki-2</i> MRE2 mut1 | 80 ± 20 nM   | 76 ± 4 nM    |
| <i>cki-2</i> MRE2 mut2 | >500 nM      | >500 nM      |

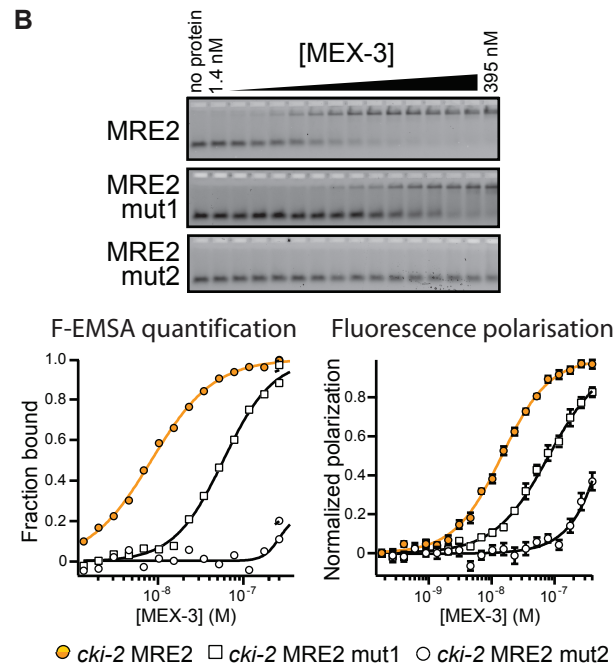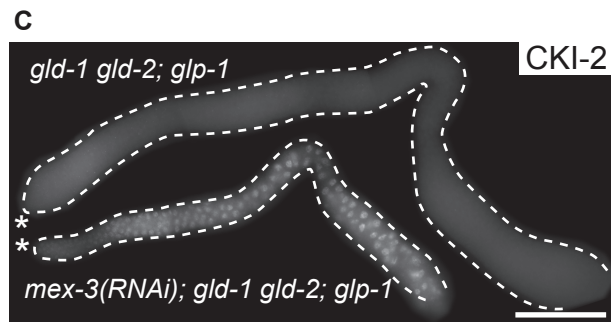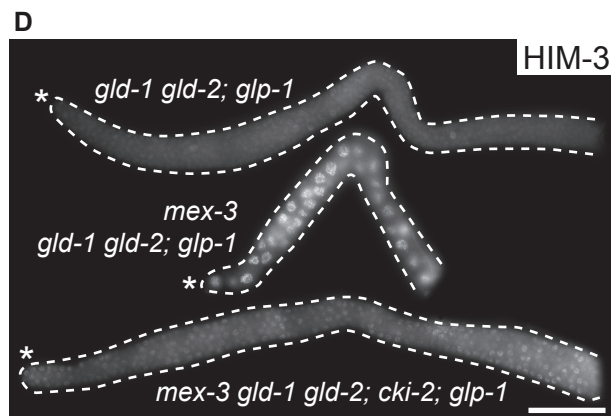

### Figure S3

*MEX-3 associates with MRE2 in the cki-2 3'UTR and regulates CKI-2 expression in certain genetic backgrounds.*

(A) Affinities of MEX-3 to indicated RNA elements as determined by F-EMSA and FP assays. While MRE2 associates with MEX-3 tightly, MRE1 is predicted to be occluded by a stable hairpin (unpublished observation) and is not expected to associate with MEX-3.  $K_{d,app}$ , apparent equilibrium dissociation constant. For oligo sequences used see Table S1 in Supplemental Methods. (B) Top panel: F-EMSA gel pictures demonstrating association of MEX-3 to wild-type and mutated MRE2 from the *cki-2* 3'UTR. Bottom left: quantification of gel shifts shown above. The fraction of bound RNA was plotted as a function of protein concentration and fit to the Hill equation to determine the apparent equilibrium dissociation constant ( $K_{d,app}$ ). Bottom right: affinity as determined by fluorescence polarization assays. Polarization is plotted as a function of protein concentration and fit to the Hill Equation to determine  $K_{d,app}$ . (C) CKI-2 immuno-staining on gonads (outlined) dissected from animals of the indicated genotype. MEX-3 prevents CKI-2 expression in *gld-1 gld-2; glp-1(lf)* gonads. (D) Immuno-staining for the synaptonemal complex component HIM-3 on dissected gonads (outlined) of indicated genotypes. Upregulation of CKI-2 in *mex-3 gld-1 gld-2; glp-1(lf)* gonads correlates with proliferation arrest and expression of the meiotic marker HIM-3. Removing *cki-2* from the *mex-3 gld-1 gld-2; glp-1(lf)* gonad rescues the proliferation defect and prevents accumulation of HIM-3. Scale bars: 50 $\mu$ m. Although MEX-3 is non-essential in the wild-type gonad, these experiments demonstrate that, in the presence of additional mutations, MEX-3 prevents meiosis by repressing CKI-2 expression.

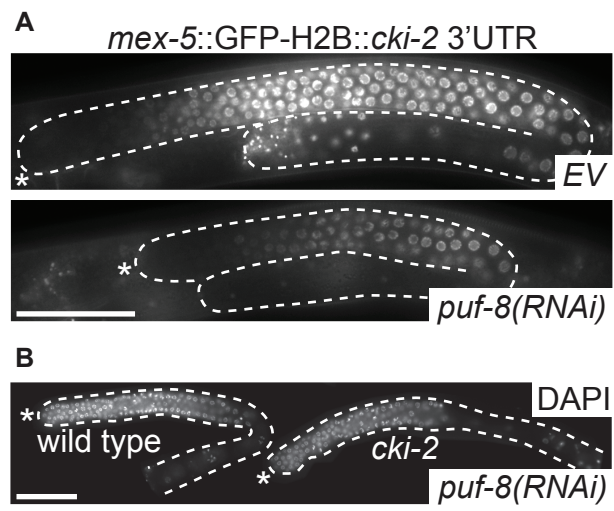

## Figure S4

*PUF-8 does not repress CKI-2.*

(A) Live worms (gonads outlined) expressing the GFP::H2B reporter under the control of the wild type *cki-2* 3'UTR upon mock (EV: empty vector) or *puf-8* RNAi. Depletion of *puf-8* did not de-repress the reporter, though it did reduce germ line size as previously reported (Subramaniam and Seydoux 2003). (B) Dissected DAPI-stained gonads (outlined) of the indicated genotype upon RNAi of *puf-8*. *puf-8*(RNAi) caused germ line underproliferation in both wild-type and *cki-2* animals, indicating that this phenotype does not depend on CKI-2. Scale bars: 50µm

## Supplementary Methods

### Table S1

*Oligonucleotide sequences used in in-vitro RNA binding assays.*

|                       |                                |
|-----------------------|--------------------------------|
| MRE2 WT               | ACUCAAAUCAUAGACAUUCUAGUUAUAAAU |
| MRE2 mut1             | ACUCAAAUCCCCACAUCCCCGUUAUAAAU  |
| MRE2 mut2             | ACUCAAAUCCCCACAUCCCCGUCCCCAAU  |
| FBEa ( <i>gld-1</i> ) | AUAGAAUCAUGUGCCAUAUCAUGUUG     |
| FBE1 WT               | UUUAUCUGUGAAUUUGAAAU           |
| FBE1 mut              | UUUAUCACAGAAUUUGAAAU           |
| FBE2 WT               | CAUACCCUGUCCAUUUCUGU           |
| FBE2 mut              | CAUACCCACACCAUUUCUGU           |
| FBE3 WT               | CAUUUCUGUGUUCUACUCCU           |
| FBE3 mut              | CAUUUCACAGUUCUACUCCU           |
| FBE4 WT               | CUACUCCUGUAAAAAAAGUC           |
| FBE4 mut              | CUACUCCACAAAAAAAGUC            |

### Table S2

*Coordinates of regions deleted in the *cki-2* 3'UTR reporters*

| name                   | deleted nucleotides (of 520) |
|------------------------|------------------------------|
| $\Delta$ M2            | 409-426                      |
| $\Delta$ 1 $\Delta$ M2 | 1-302, 409-426               |
| $\Delta$ 2 $\Delta$ M2 | 106-235, 409-426             |
| $\Delta$ 3 $\Delta$ M2 | 211-340, 409-426             |
| $\Delta$ 4             | 314-463                      |
| $\Delta$ 5 $\Delta$ M2 | 409-426, 409-426             |
| $\Delta$ FBE1-4        | 246-313                      |

## Supplementary References

Biedermann, B., J. Wright, et al. (2009). "Translational repression of cyclin E prevents precocious mitosis and embryonic gene activation during *C. elegans* meiosis." *Dev Cell* 17(3): 355-64.

Ciosk, R., M. DePalma, et al. (2004). "ATX-2, the *C. elegans* ortholog of ataxin 2, functions in translational regulation in the germline." *Development* 131(19): 4831-41.

Draper, B. W., C. C. Mello, et al. (1996). "MEX-3 is a KH domain protein that regulates blastomere identity in early *C. elegans* embryos." *Cell* 87(2): 205-16.

Subramaniam, K. and G. Seydoux (2003). "Dedifferentiation of primary spermatocytes into germ cell tumors in *C. elegans* lacking the pumilio-like protein PUF-8." *Curr Biol* 13(2): 134-9.
